# Supplementary material for: Field Margins, Foraging Distances and Their Impacts on Nesting Pollinator Success
Source: PubMed Central journal article supplement (PMC3185061; doi:10.1371/journal.pone.0025971), 2011-10-03

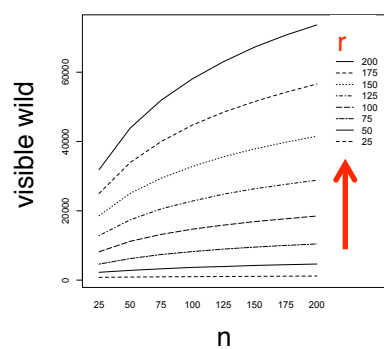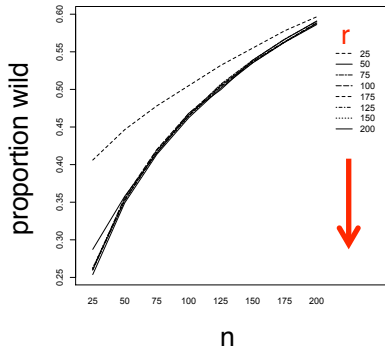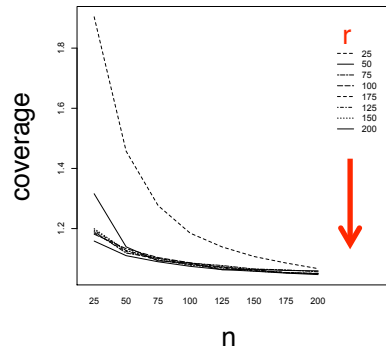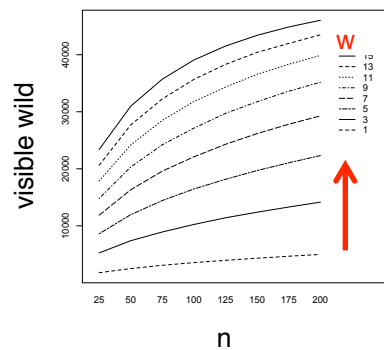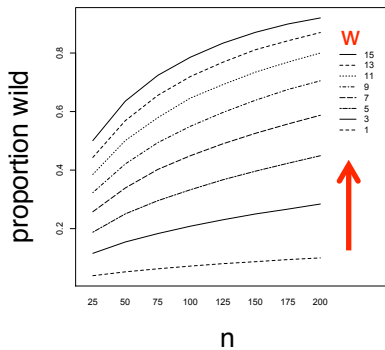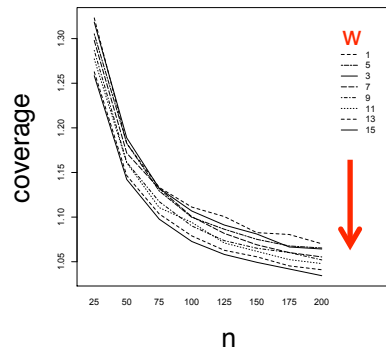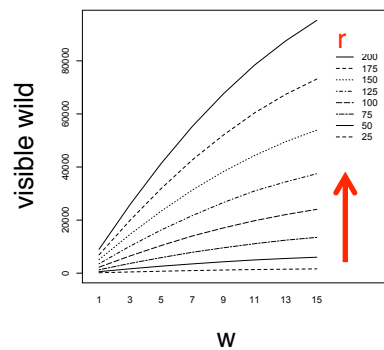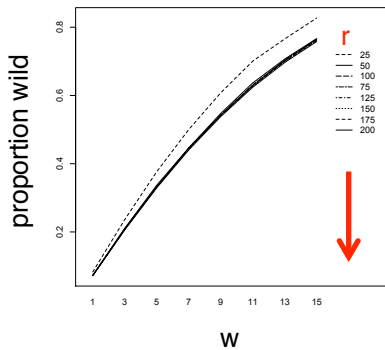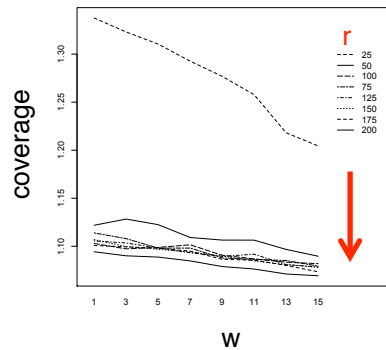

Supplement: pone.0025971.s001.pdf [file pone.0025971.s001.pdf]
